# Supplementary material
Source: PubMed Central journal article supplement (PMC5856727)
Supplement: 13205_2018_1204_MOESM1_ESM.pdf [file 13205_2018_1204_MOESM1_ESM.pdf]

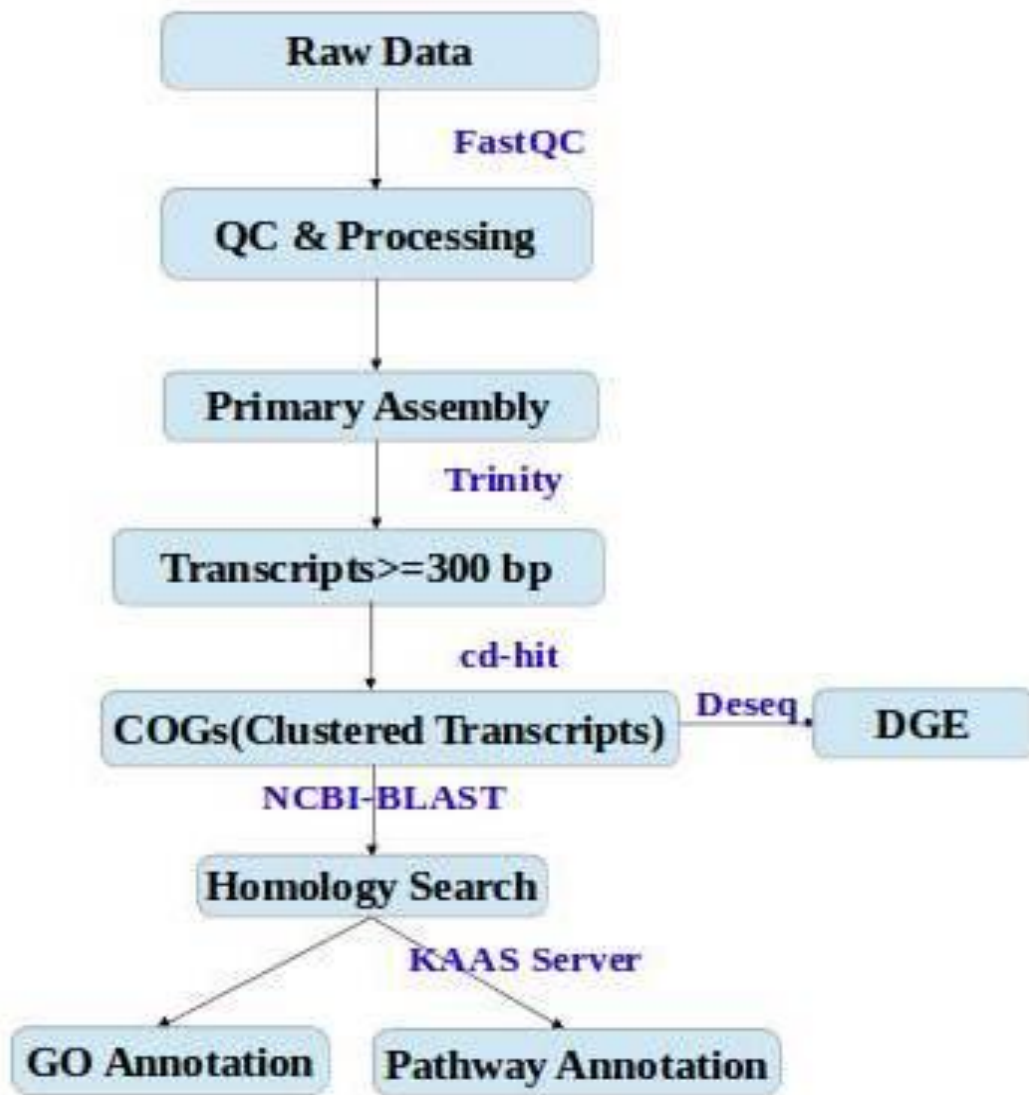

**Figure S1.** Workflow of *De novo* Transcriptome Analysis

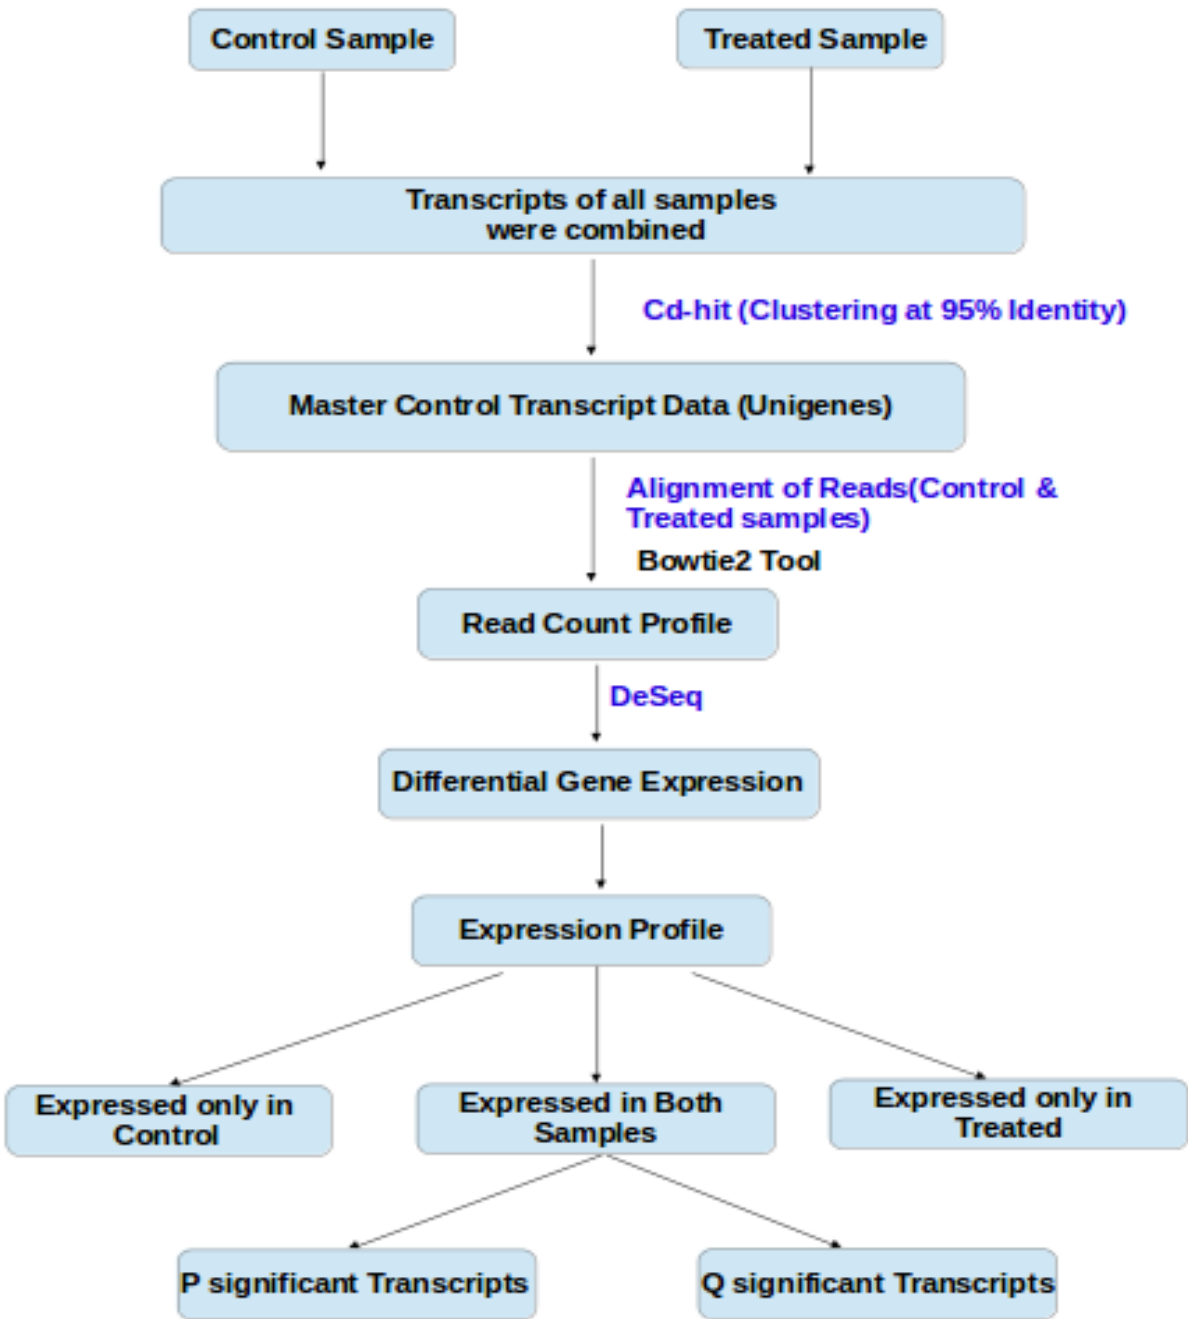

**Figure S2.** Workflow of differential gene expression (DGE) analysis
